# Supplementary material for: Microbial metabolite restricts 5-fluorouracil-resistant colonic tumor progression by sensitizing drug transporters via regulation of FOXO3-FOXM1 axis
Source: PubMed Central journal article supplement (PMC9330515; doi:10.7150/thno.70754), 2022-07-18
Supplement: thnov12p5574s1.pdf [file thnov12p5574s1.pdf]

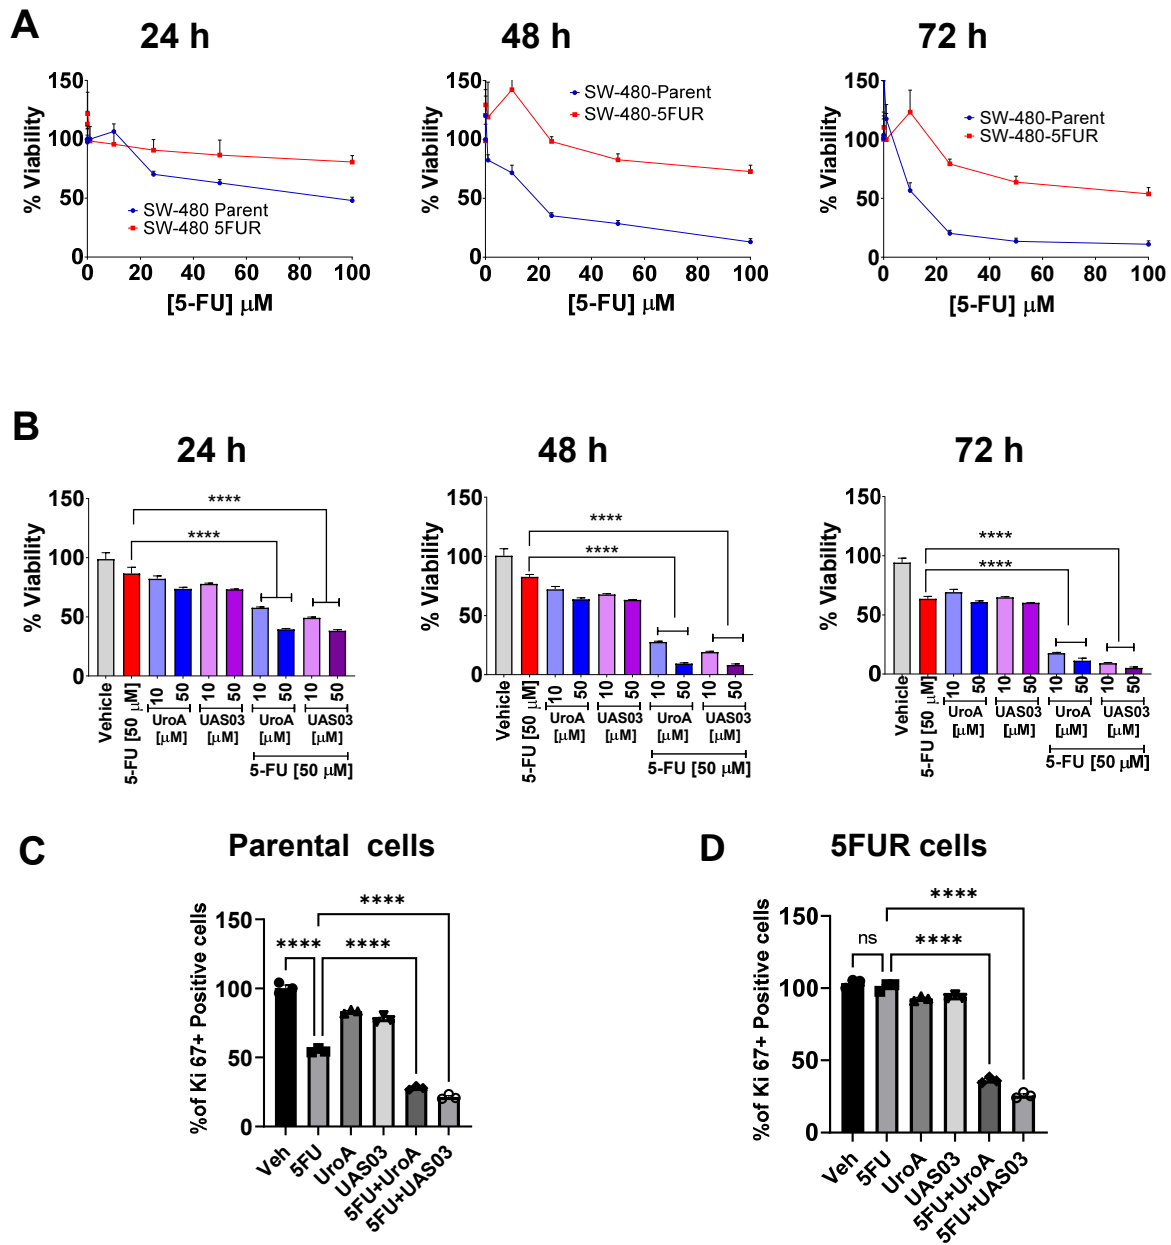

**Figure S1. UroA and UAS03 chemosensitize the SW480-5FUR colon cancer cells.** **A.** SW480-parental or SW480-FUR cells (7,000 cells/well) were plated in 96-well plate and grown for overnight. Cells were treated with indicated compounds in dose dependent manner for 24, 48, 72 h. The cell proliferation was measured using standard MTT assay. **B.** Cell viability (SW480 FUR) co-treatments as indicated was calculated against DMSO (0.1%) as 100% Cell proliferation was evaluated by Ki67 positive cells using flowcytometry methods in SW480 parental (**C**) and 5FUR cells (**D**). Data are represented as mean  $\pm$  S.E.M. of three different experiments. ns: non-significant; \*\*\*\*P < 0.0001.

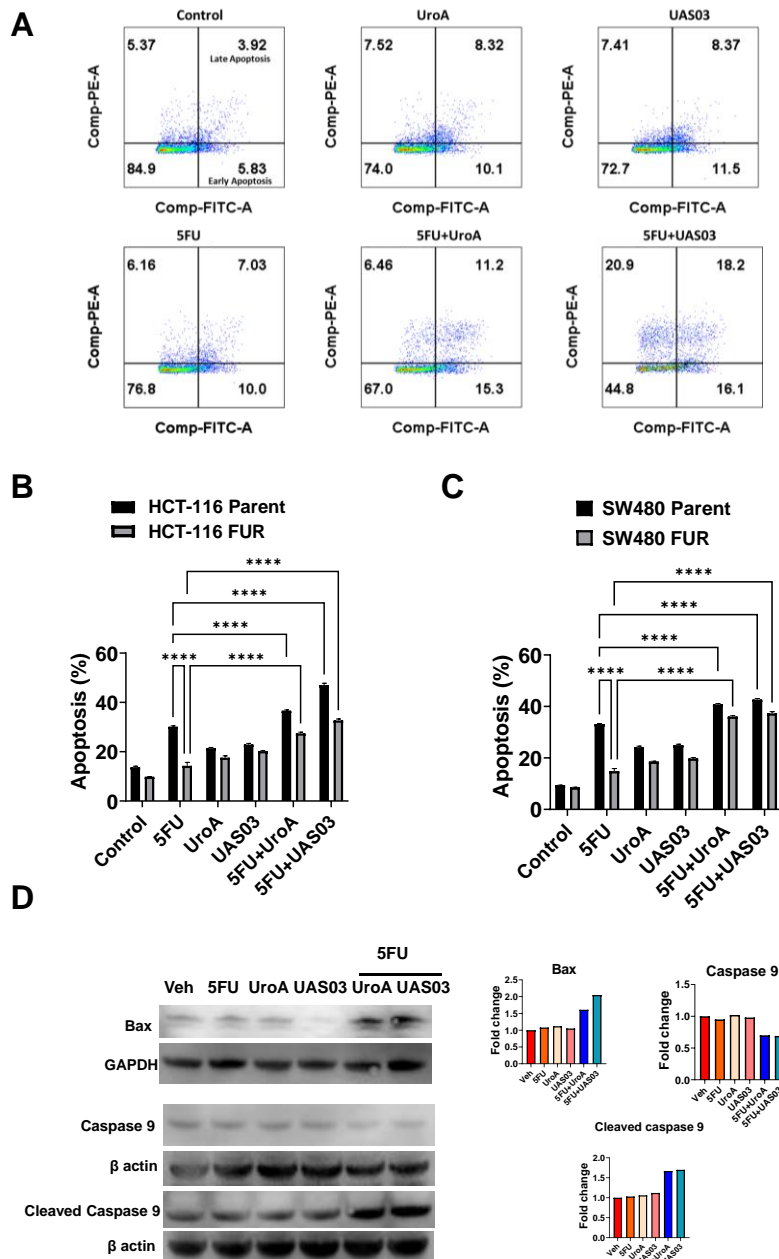

**Figure S2. Co-treatment with UroA or UAS03 with 5FU promote apoptosis of 5FUR cells. A.** Representative flowcytometry of Annexin V-FITC and propidium iodide-PE of HCT-116 5FUR cells treated with UroA/UAS03/5FU in the presence or absence of 5FU. **B-C.** HCT-116-parental and HCT-116-FUR (**B**) or SW-480 parental and SW480-FUR (**C**) cells were treated with either 5FU (50  $\mu$ M), UroA (50 $\mu$ M), UAS03 (50 $\mu$ M) or 5FU (50  $\mu$ M) in combination of UroA (50 $\mu$ M) or UAS03 (50 $\mu$ M) for 24 h. Cells were stained with annexin V-FITC and propidium iodide (PI) and analyzed for apoptosis using flow cytometry. Data are represented as mean  $\pm$  S.E.M. of three different experiments. Statistics performed one way ANOVA using Graph Prism Software. \*\*\*\*  $P < 0.0001$ . **D.** HCT-116 5FUR cells treated with either 5FU (50  $\mu$ M), UroA (50 $\mu$ M), UAS03 (50 $\mu$ M) or 5FU (50  $\mu$ M) in combination of UroA (50 $\mu$ M) or UAS03 (50 $\mu$ M) for 24 h and cell lysates prepared using RIPA plus buffer. The cell lysates were loaded on SDS-PAGE and the expression of indicated apoptosis markers was analyzed by Western blot analysis.

### A HCT-116-FUR (24 h)

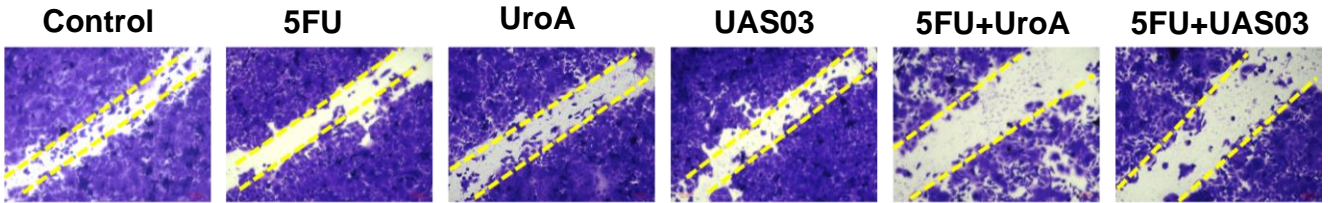

### B SW-480-FUR cells (24 h)

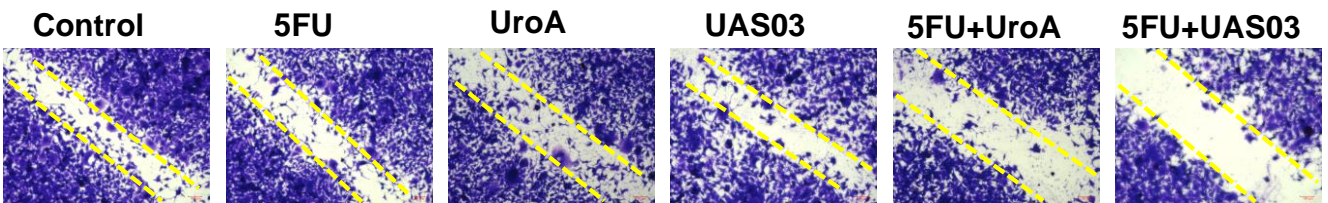

**Figure S3. UroA and UAS03 co-treatment with 5 FU reduce cell migration in ‘scratch assay’.** HCCT-116-FUR (A) SW480-FUR cells ( $1 \times 10^5$ /well) (B) were plated in 12 well plate and allowed them to form monolayer. ‘Scratch’ was made using sterile p200 pipette tip and washed cells. The cells were treated with vehicle (0.1% DMSO) or UroA or UAS03 (50  $\mu$ M) in the presence of 5 FU (50  $\mu$ M). After 24 h, the cells were stained with crystal violet and images were captured using microscope.

**A**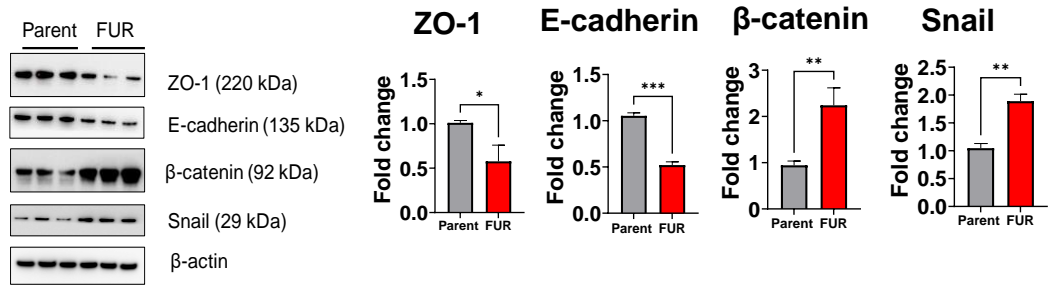**B**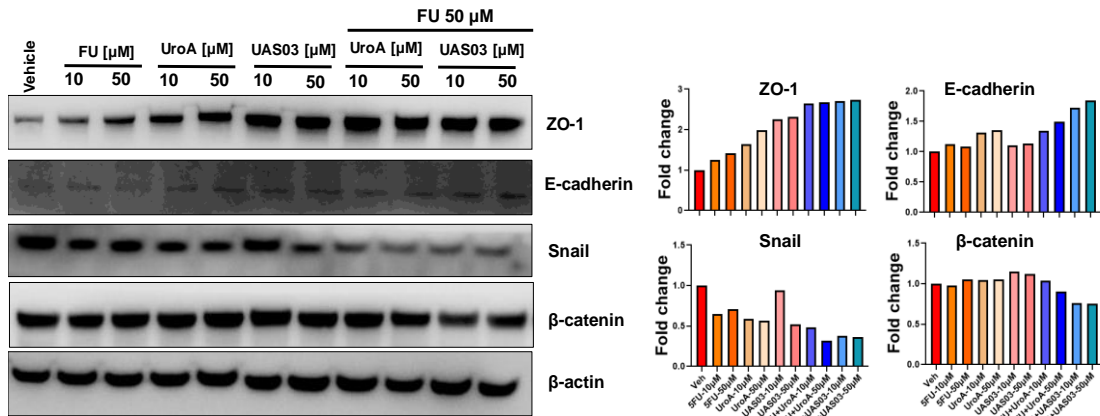**C**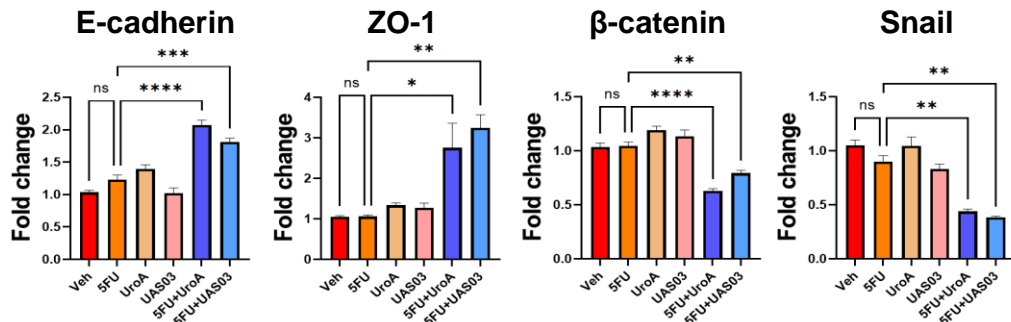

**Figure S4. 5FU modulates EMT markers upon co-treatment with UroA/UAS03 in SW480 parental and SW480-5FUR cells.** **A.** Western blot analysis of EMT makers in SW480 parental and SW480-5FUR cells. **B.** Western blot analysis of EMT makers in SW480-FUR cells treated with 5-FU in the presence of UroA or UAS03 at indicated doses. **C.** Total RNA was isolated from SW480-FUR cells and analyzed for the expression of E-cadherin, ZO-1,  $\beta$ -catenin and Snail. The fold changes in mRNA levels were determined by RT PCR method. Error bars,  $\pm$ SEM. Statistics performed one way ANOVA using Graph Prism Software. ns: non-significant, \* $p < 0.05$ , \*\* $p < 0.01$ , \*\*\* $p < 0.001$

# SW-480

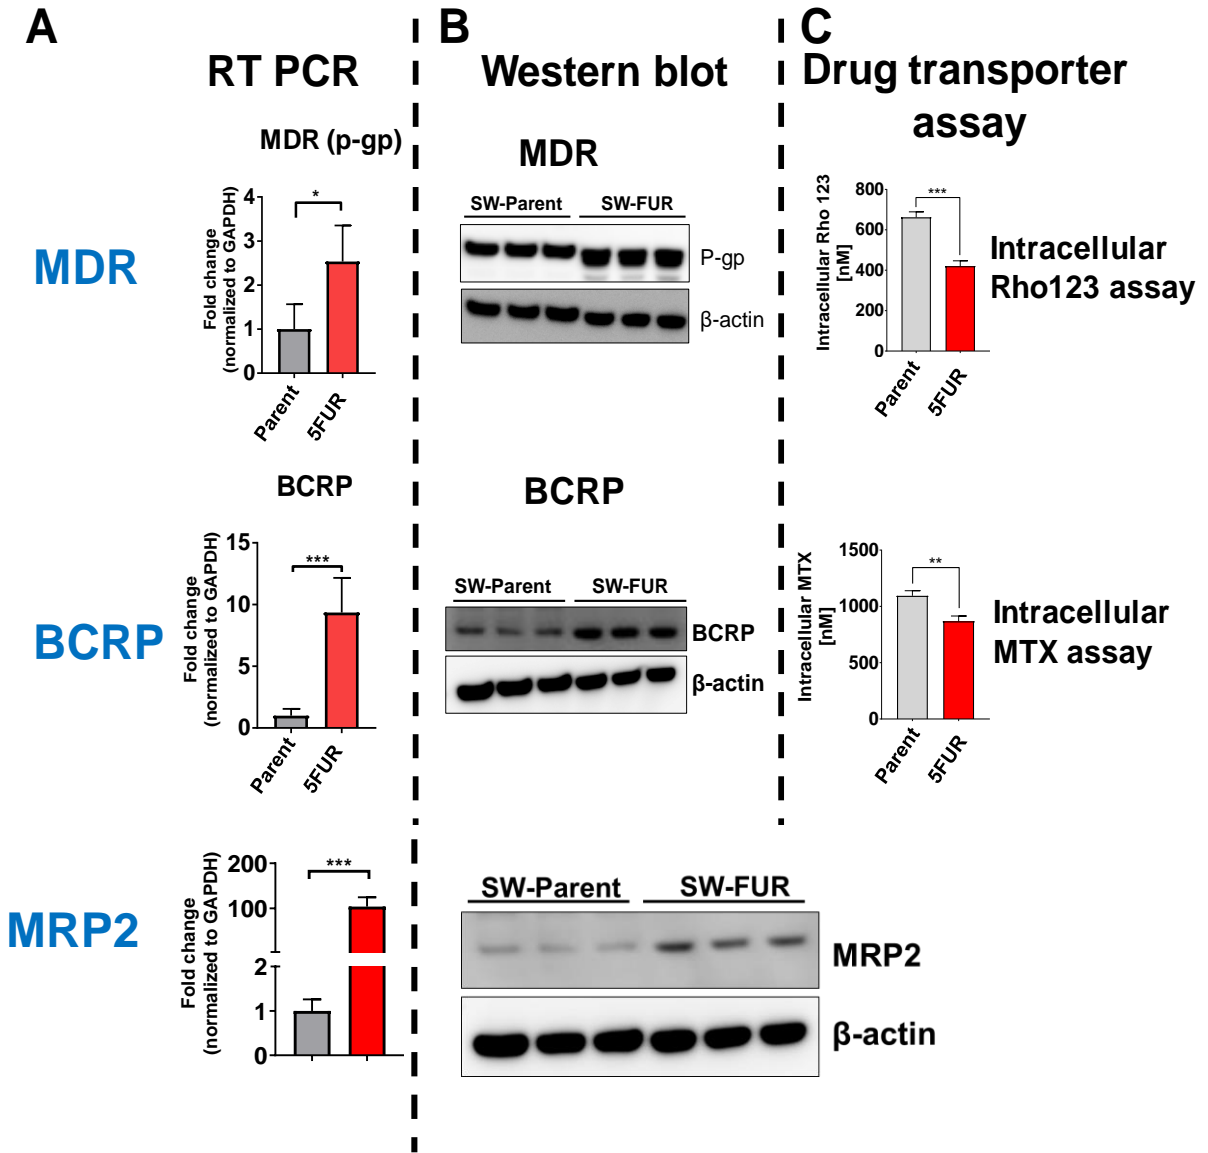

**Figure S5. Increased levels of drug transporters in SW480-FUR cells.** **A.** Total RNA was isolated from parental SW480 and SW480-FUR cells and analyzed expression of MDR, BCRP and MRP2. **B.** Cell lysates of parental SW480 and SW480-FUR cells were subjected to Western blot analysis for the indicated proteins. **C.** Drug transporter assays for MDR and BCRP were performed using Rho123 and MTX. Intracellular levels of these drugs were measured. Statistics performed using unpaired t-test. ns: non-significant, \* $p < 0.05$ , \*\* $p < 0.01$ , \*\*\* $p < 0.001$ . Error bars indicate  $\pm$ SEM

# HCT-116

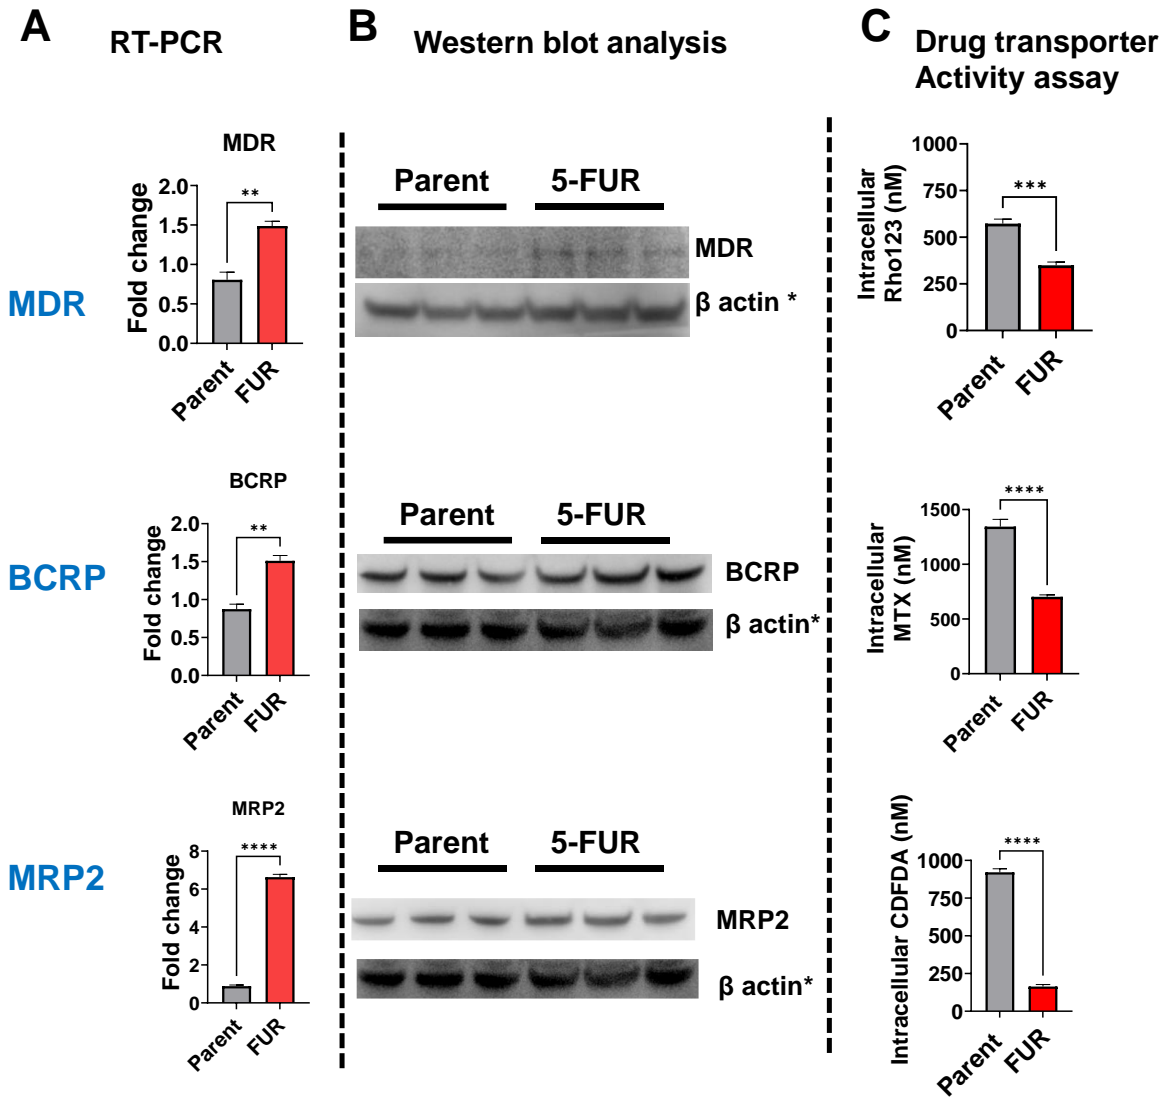

**Figure S6. Increased levels of drug transporters in HCT-116 FUR cells.** **A.** Total RNA was isolated from parental HCT-116 and HCT-116-FUR cells and analyzed expression of MDR, BCRP and MRP2 **B.** Cell lysates of parental HCT-116 and HCT-116-FUR cells were subjected to Western blot analysis for the indicated proteins. **C.** Drug transporter assays for MDR and BCRP were performed using Rho123, MTX and CDFDA Intracellular levels of these drugs were measured. Statistics performed using unpaired t-test. ns: non-significant, \* $p < 0.05$ , \*\* $p < 0.01$ , \*\*\* $p < 0.001$ . Error bars indicate  $\pm$ SEM

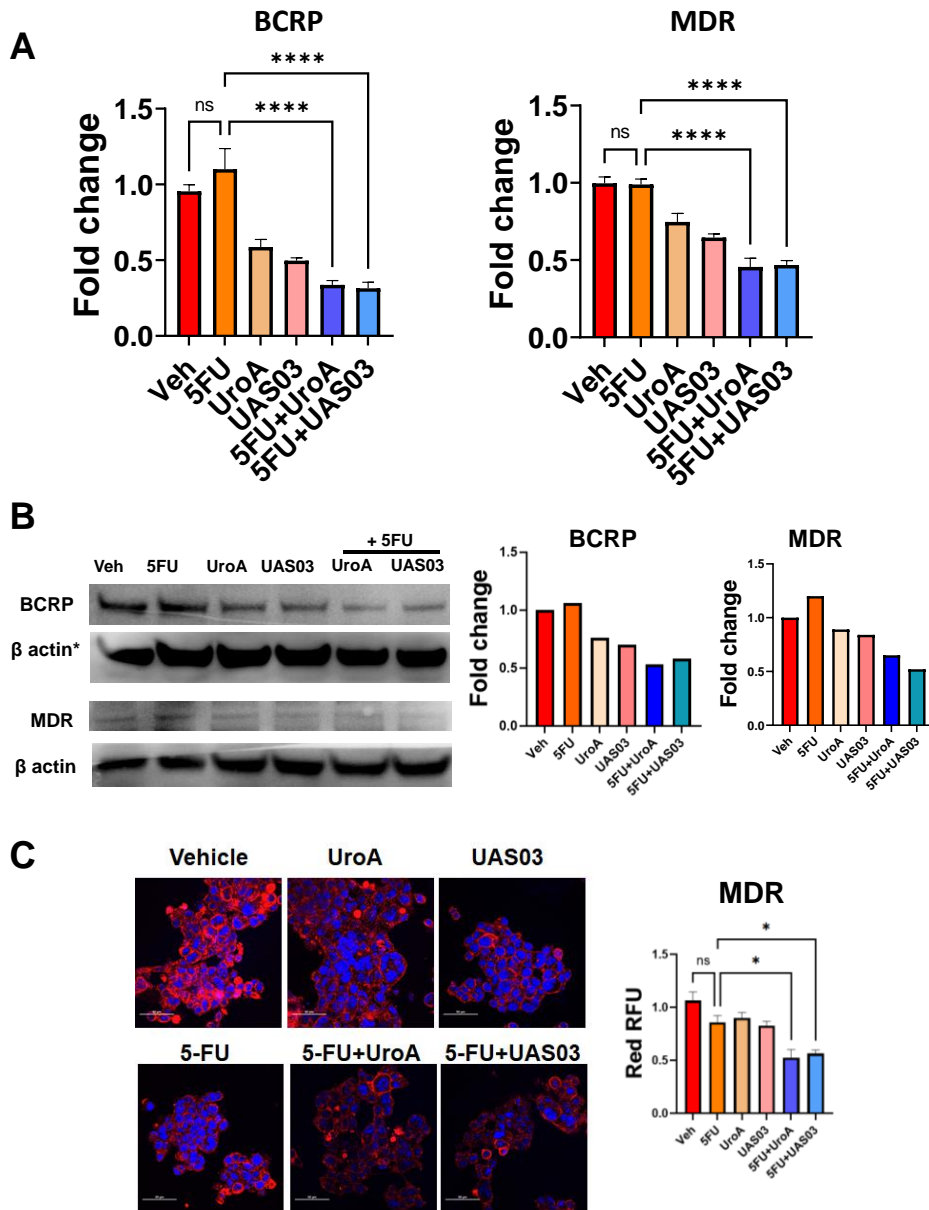

**Figure S7. Co-treatment with UroA/UAS03 and 5FU reduce expression of drug transporters**

**A.** Total RNA was isolated from HCT116-FUR cells treated with vehicle or 5FU (50  $\mu$ M) in combination with UroA or UAS03 (50  $\mu$ M) for 24 h. mRNA levels were determined by real time PCR using SyBR green method. **B.** Cell lysates of HCT-116-FUR cells treated with vehicle or 5FU (50  $\mu$ M) in combination with UroA or UAS03 (50  $\mu$ M) for 24 h were subjected to Western blot analysis for the indicated proteins. **C.** HCT-116-FUR cells were grown on 8 well chamber slide and treated with either 5FU (50  $\mu$ M), UroA (50 $\mu$ M), UAS03 (50 $\mu$ M) or 5FU (50  $\mu$ M) in combination of UroA (50 $\mu$ M) or UAS03 (50 $\mu$ M) for 24 h. The cells were stained with anti-MDR antibody followed by secondary antibody tagged with Alexa-594. Nucleus was stained using DAPI. The confocal images were captured. Scale bars indicate 50  $\mu$ m. Error bars,  $\pm$ SEM. Statistics performed one way ANOVA using Graph Prism Software. ns: non-significant, \* $p < 0.05$ , \*\* $p < 0.01$ , \*\*\* $p < 0.001$

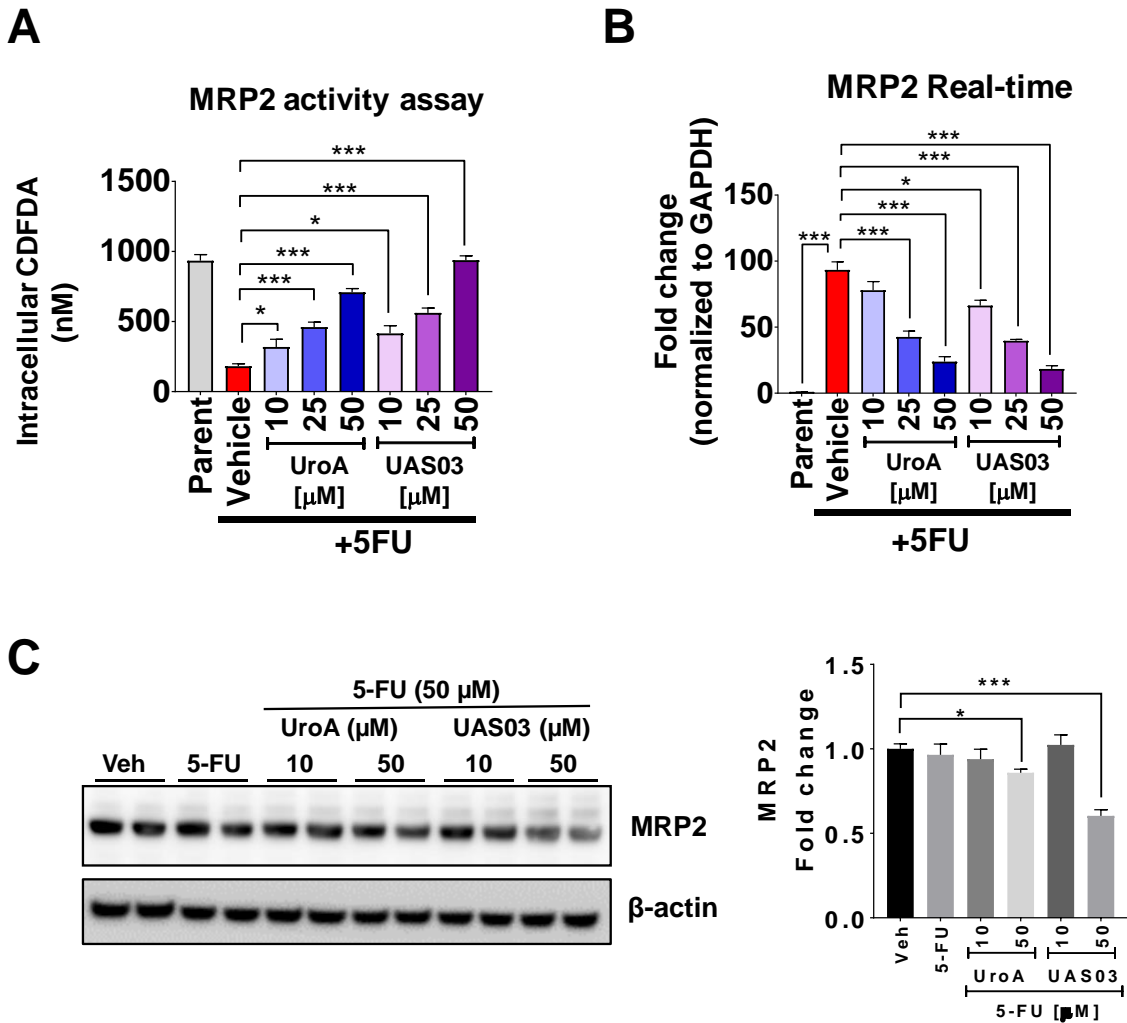

**Figure S8. Treatment with UroA and UAS03 reduce expression and activity of MRP2. A.** Parental SW480 and SW480-FUR cells were used evaluate MRP2 efflux of CDFDA. MRP2 transporter assay was performed using CDCFDA substrate and measured intracellular CDCFDA after incubation 1 h in the presence of Vehicle (0.1% DMSO) or UroA or UAS03 and 5FU (50  $\mu$ M) **B.** Parental SW480 and SW480-FUR cells were treated with vehicle (0.1% DMSO) or UroA or UAS03 (10, 25, 50  $\mu$ M) and 5FU (50  $\mu$ M) for 24 h. Total RNA was isolated and mRNA levels of MRP2 were determined by realtime PCR. **C.** SW480-FUR cells treated with UroA or UAS03 in the presence of 5 FU (50  $\mu$ M) for 24 h. MRP2 protein levels were measured by Western blots and quantified fold change. Statistics performed one way ANOVA using Graph Prism Software. \* $p < 0.05$ , \*\* $p < 0.01$ , \*\*\* $p < 0.001$



## SW480

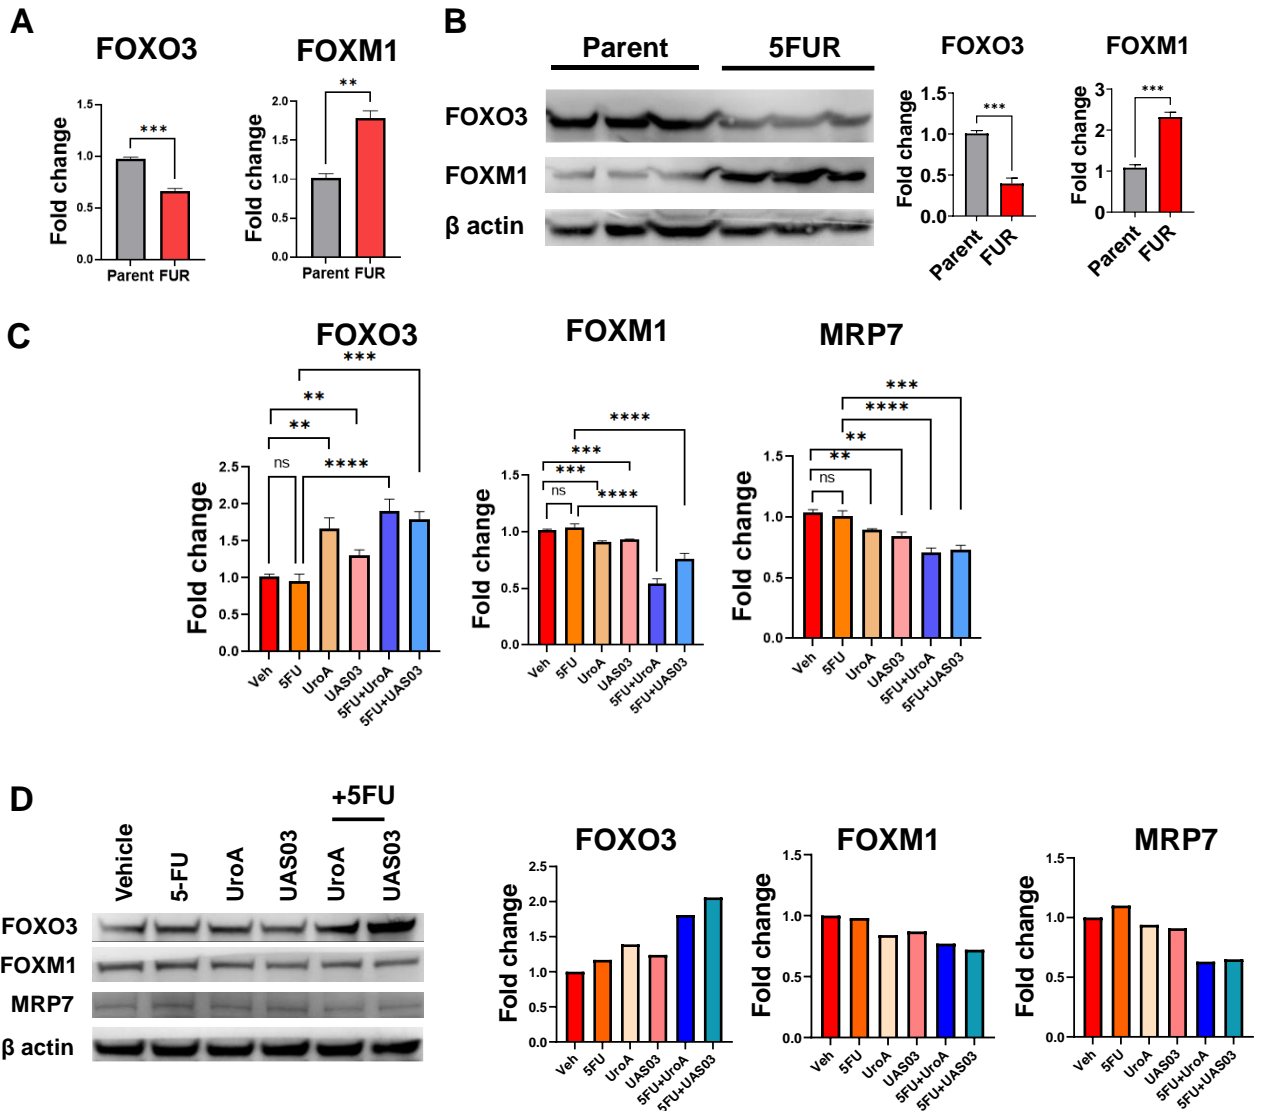

**Figure S9. Treatment with UroA/UAS03 regulates the FOXO3-FOXM1 axis.** **A.** Total RNA was isolated from parental SW480 and SW480-FUR cells and analyzed the mRNA expression of FOXO3 and FOXM1. The fold changes in mRNA levels were determined by RT PCR method. **B.** Western blot analysis of FOXO3 and FOXM1 in parental SW480 and SW480-FUR cells. **C.** Total RNA was isolated from SW480-FUR cells treated with either 5FU (50  $\mu$ M) or UroA (50  $\mu$ M) or UAS03 (50  $\mu$ M) or in combination for 24 h. The mRNA expression of FOXO3, FOXM1 and MRP7 was determined by SyBR RT PCR. The fold changes in mRNA levels were represented. **D.** SW480-FUR cells were treated with either 5FU (50  $\mu$ M) or UroA (50 $\mu$ M) or UAS03 (50 $\mu$ M) or in combination for 24 h. Western blot analysis of FOXO3, FOXM1 and MRP7 is shown. Statistics performed one-way ANOVA using Graph Prism Software. Error bars,  $\pm$ SEM. \*\* $p < 0.01$ , \*\*\* $p < 0.001$ .

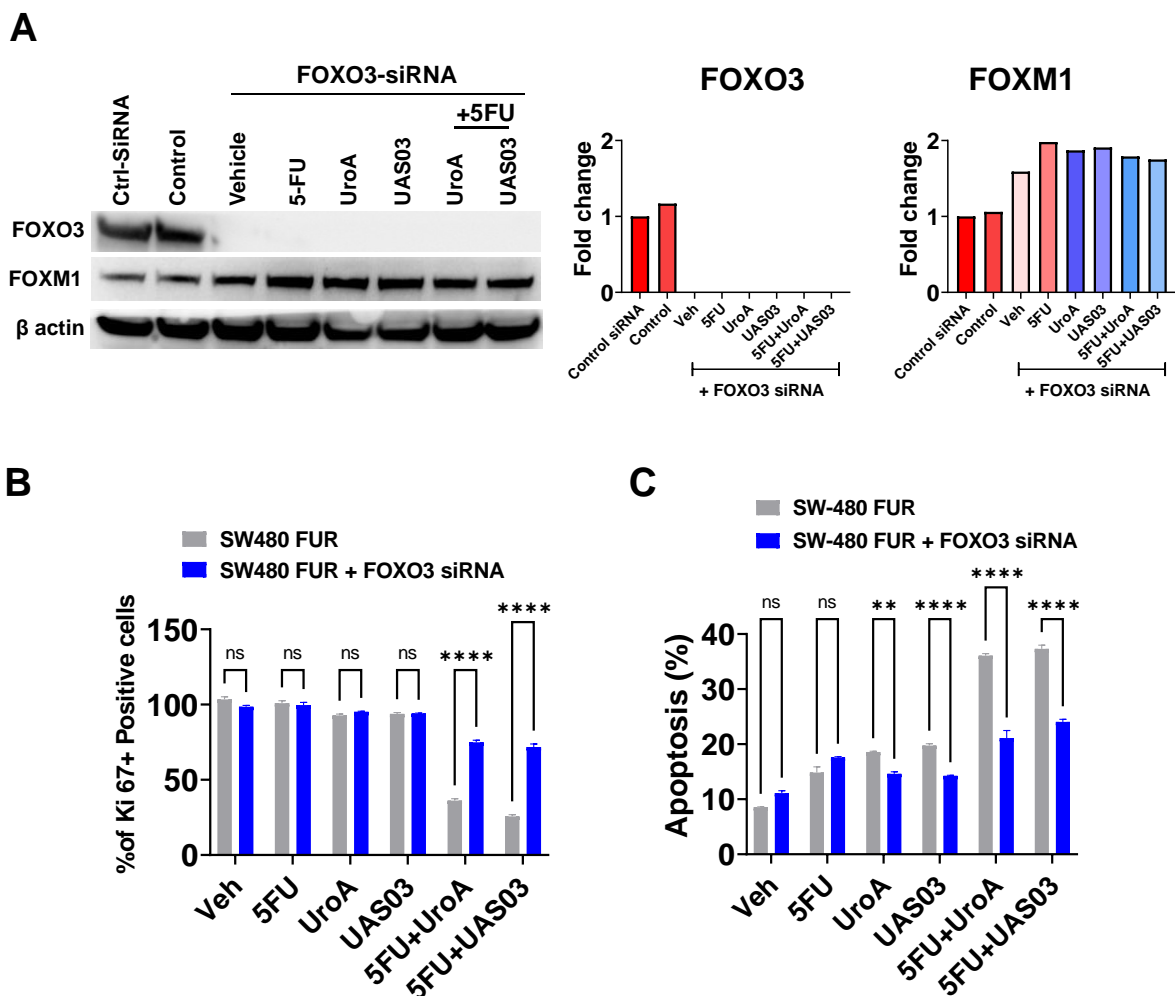

**Figure S10. Knockdown of FOXO3 abrogated UroA/UAS03-mediated chemosensitization activities.** A. FOXO3 was knockdown in SW480-5FU cells using FOXO3-siRNA. Expression of FOXO3 was confirmed by Western blot. These cells were treated with either 5FU (50  $\mu$ M) or UroA (50 $\mu$ M) or UAS03 (50 $\mu$ M) or in combination for 24 h, and expressions of FOXM1 and FOXO3 were determined by Western blots. Cell proliferation by Ki67 staining (B) and apoptosis by Annexin V and PI staining were measured using flow cytometry methods (C) Statistics performed one-way ANOVA using Graph Prism Software. Error bars,  $\pm$ SEM. \*\* $p$  < 0.01, \*\*\* $p$  < 0.001.

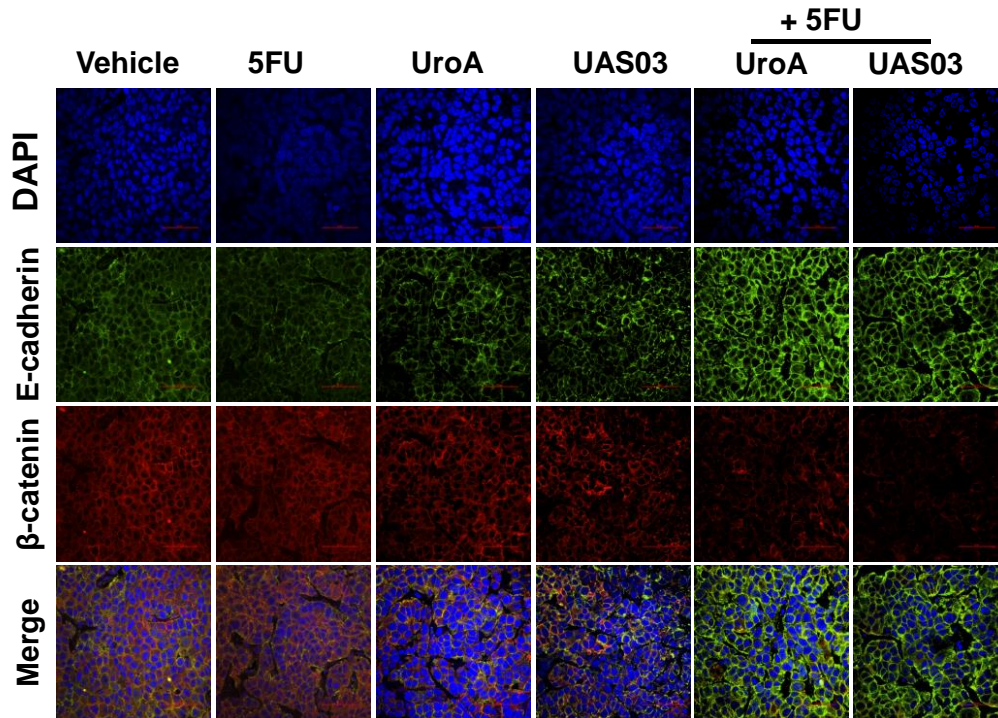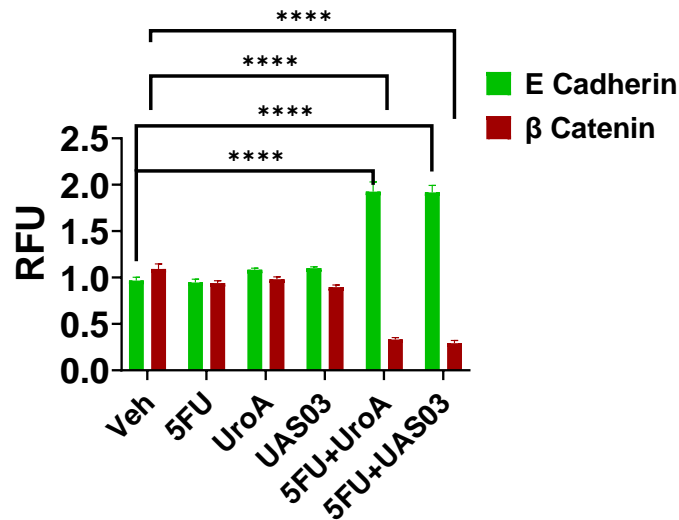

**Figure S11. 5FU modulates EMT markers upon co-treatment with UroA/UAS03 in 5FU tumors.** Tumor sections were stained with rabbit anti E-cadherin and mouse anti- $\beta$  Catenin, followed by secondary antibody tagged with anti-rabbit Alexa 488 and anti-mouse Alexa-594. Nucleus was stained using DAPI. The representative fluorescence images were captured using Nikon A1R confocal microscope. Scale bars indicate 50  $\mu$ m. The fluorescence intensity ( $n = 15-20$  cell membrane regions) was measured. Statistics performed using one-way ANOVA in GraphPad Prism software. Error bar, mean  $\pm$  SEM, \*\*\*\* $p < 0.001$ .

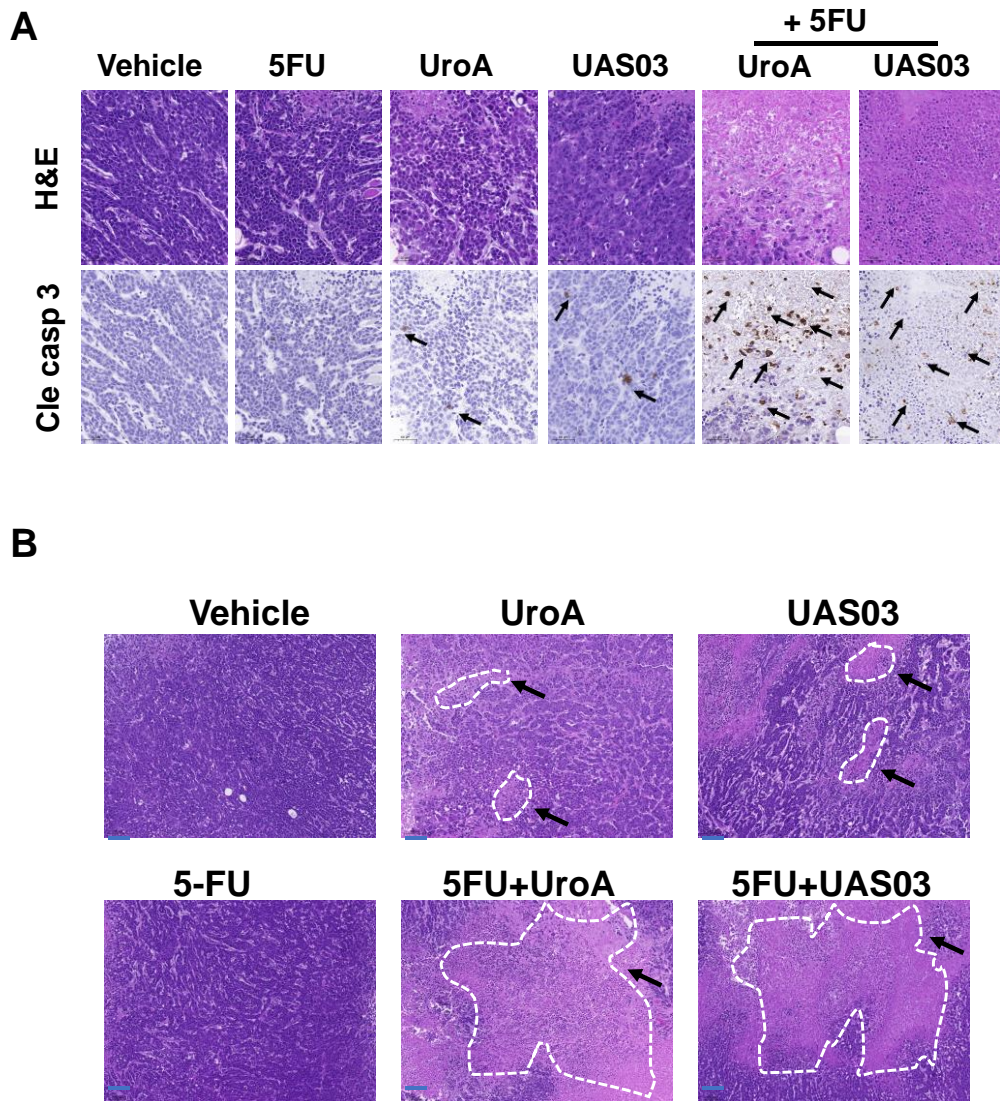

**Figure S12. UroA/UAS03 treatment in combination with 5FU reduced tumors and induced apoptosis.** (A) Representative H&E staining images of the tumor sections (Upper panel). In H&E staining, nuclei were stained blue, the cytoplasm and extracellular matrix were stained pinkish. The tumor sections were stained for cleaved caspase 3 (lower panel) by IHC staining. Black arrows indicate the presence of cleaved caspase 3. Images were captured at 200 x magnification. Embedded scale bar represents 50  $\mu$ m. (B) In representative H&E-stained images of the tumor sections, the white dotted lines show the tumor necrosis region. The blue scale bar represents 100  $\mu$ m.

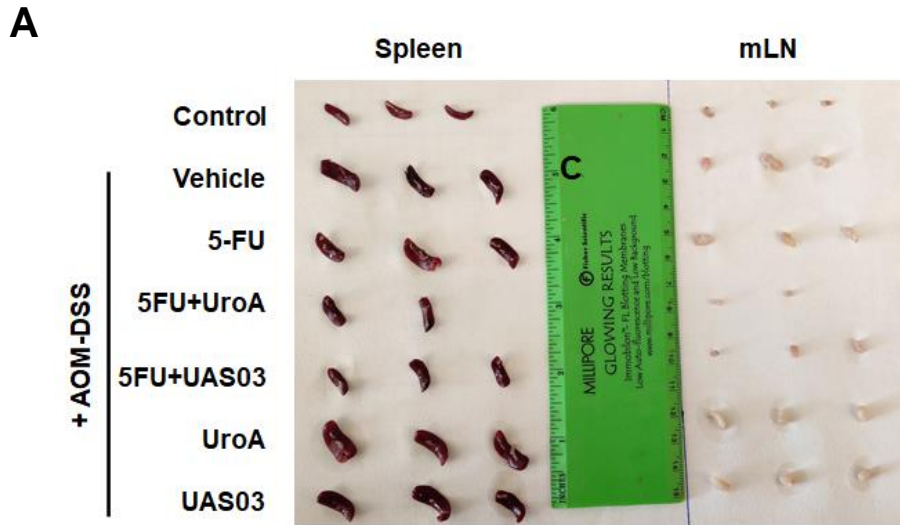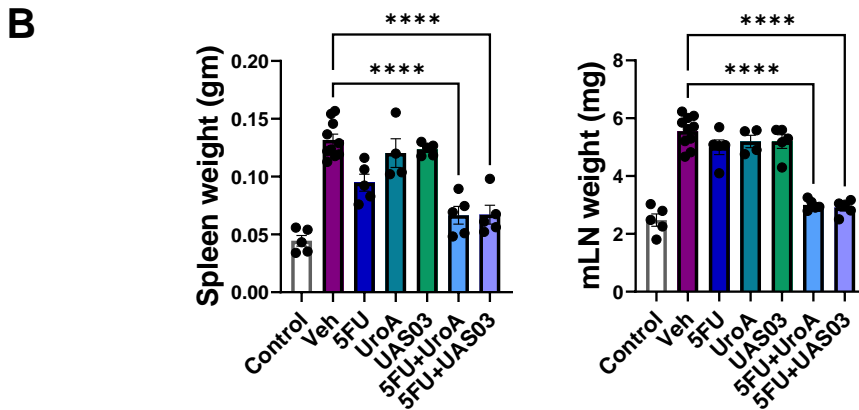

**Figure S13. 5FU in combination with UroA or UAS03 treatment protects against AOM-DSS induced splenomegaly and swelling of mesenteric lymph nodes (mLN).** **A.** Representative images of spleen and mLN. **B.** Bar diagram representing total weights of spleen and mLN. Error bars,  $\pm$ SEM, Statistics performed one way ANOVA using Graph Prism Software. \*\*\*\* $p < 0.0001$ .

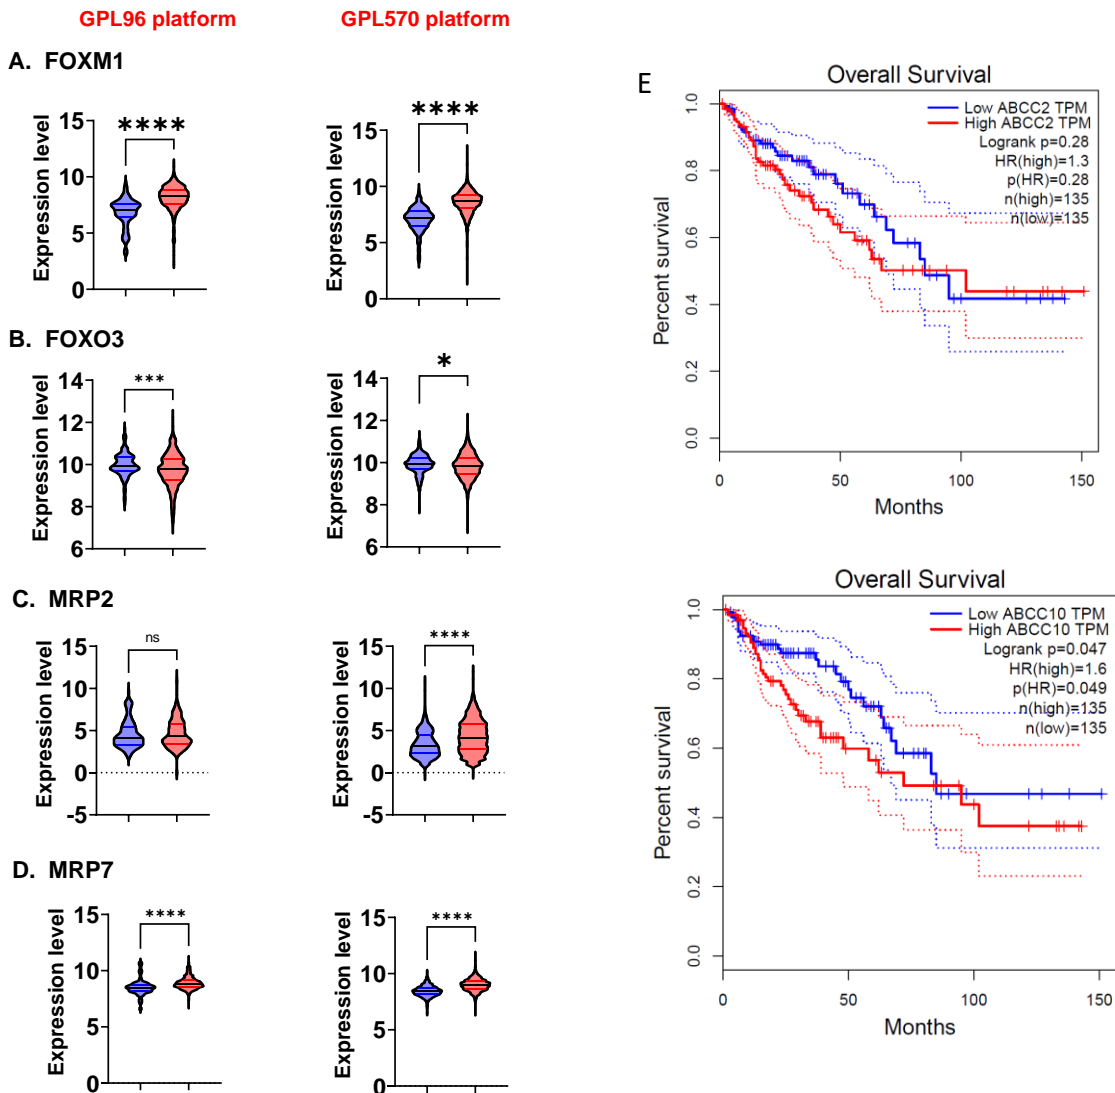

**Figure S14. Expression analysis of indicated genes in normal and colon cancer human subjects.** A-D. Expression of FOXM1, FOXO3, MRP2 and MRP7 were obtained from Gene Expression database of Normal and Tumor tissues 2 (GENT2) (<http://gent2.appex.kr>). In this analysis, authors collected data from the GEO public repository using two platforms, U133Plus2 (GPL570) and U133A (GPL96). The above analysis contains normal colon tissues (n = 397 in GPL570 set; n = 127 in GPL96 set) and colon cancer tissues (n = 3775 in GPL570 set; n = 1112 in GPL96 set) samples. Statistics performed using two-sample t-test. \*p < 0.05; \*\*\*\*p < 0.0001. E. Survival data from resource ‘GEPIA: a web server for cancer and normal gene expression profiling and interactive analyses’ (<http://gepia.cancer-pku.cn/>). Authors analyzed colon tumors (T) (n = 275) and normal colon tissues (N) (n = 349) and we mined the data for MRP2 (ABCC2) and MRP7 (ABCC10) genes.
